# Supplementary material for: Dual inhibition of DNA-PKcs and mTOR by CC-115 potently inhibits human renal cell carcinoma cell growth
Source: publisher site journal article supplement (doi:10.18632/aging.103847), 2020-10-27
Supplement: Supplementary file [file aging-v12i20-103847-supplementary-material-SD1.pdf]

SUPPLEMENTARY FIGURE

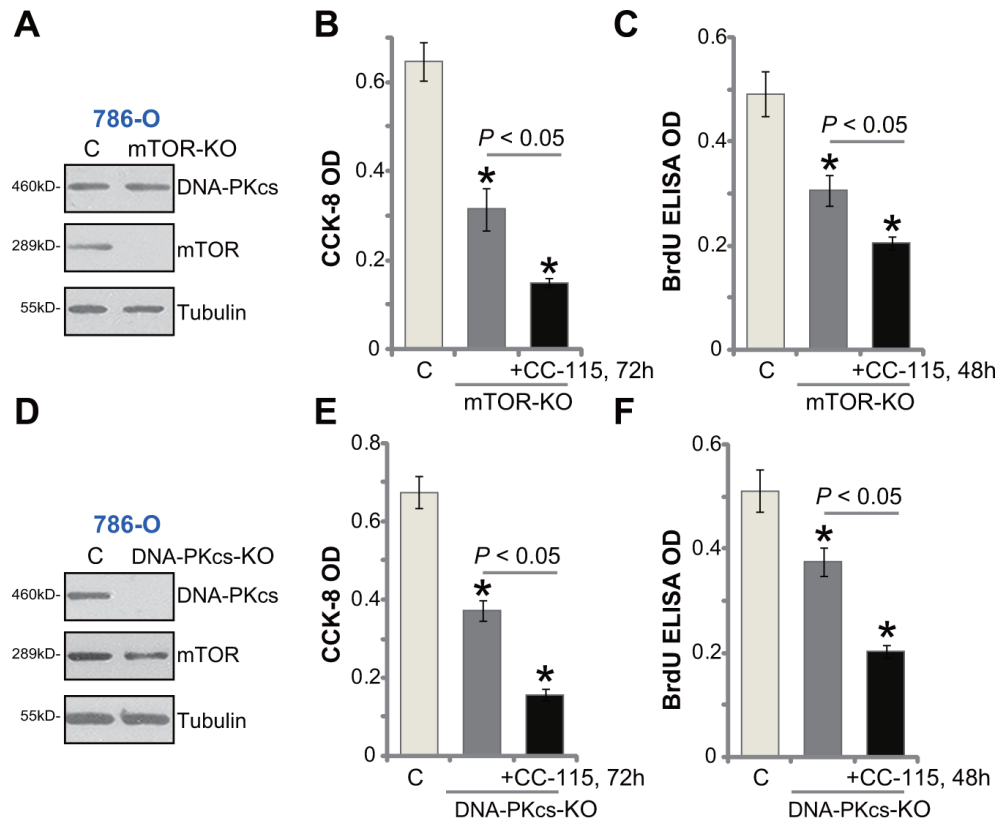

**Supplementary Figure 1.** Expression of the listed proteins in control 786-O cells (“C”), mTOR-single knockout (mTOR-KO) or DNA-PKcs-single knockout (DNA-PKcs-KO) 786-O cells were shown (**A, D**); The single knockout cells were treated with or without CC-115 (5  $\mu$ M) for 48-72h, cell viability and proliferation were tested by CCK-8 assay (**B, E**) and BrdU ELISA assay (**C, F**), respectively. The exact same number of “C” and single knockout 786-O cells were plated initially (“0h”) for the functional assays. \* $P < 0.05$  vs. “C” cells.
